# Supplementary material for: Engineering ultrafine PtIr alloy nanoparticles into porous nanobowls via a reactive template-engaged assembly strategy for high-performance electrocatalytic hydrogen production
Source: Royal Society of Chemistry journal article supplement (doi:10.1039/d3ta06847a), 2024-01-01
Supplement: d3ta06847a1.pdf [file d3ta06847a1.pdf]

## Supporting information

### **Engineering ultrafine PtIr alloy nanoparticles into porous nanobowls *via* a reactive template-engaged assembly strategy toward high-performance electrocatalytic hydrogen production**

*Zhenbo Zhang, Shuyun Liu, Yudie Zhou, Jing Li, Lin Xu\*, Jun Yang\*, Huan Pang, Mingyi Zhang, Yawen Tang\**

Z. Zhang, S. Liu, Y. Zhou, J. Li, Prof. L. Xu, Prof. Y. Tang

School of Chemistry and Materials Science, Jiangsu Key Laboratory of New Power Batteries, Jiangsu Collaborative Innovation Centre of Biomedical Functional Materials, Nanjing Normal University, Nanjing 210023, China

E-mail: xulin001@njnu.edu.cn (L. Xu), tangyawen@njnu.edu.cn (Y. Tang).

Prof. J. Yang

State Key Laboratory of Multiphase Complex Systems and Center of Mesoscience, Institute of Process Engineering, Chinese Academy of Sciences, Beijing 100190, China

Center of Materials Science and Optoelectronics Engineering, University of Chinese Academy of Sciences, Beijing 100190, China

E-mail: jyang@mail.ipe.ac.cn (J. Yang).

Prof. H. Pang

School of Chemistry and Chemical Engineering, Yangzhou University, Yangzhou 225009, China

Prof. M. Zhang

Key Laboratory for Photonic and Electronic Bandgap Materials, Ministry of Education, School of Physics and Electronic Engineering, Harbin Normal University, Harbin 150025, China

## **Experimental section**

**Reagents and Chemicals.** *N, N'*-methylenebisacrylamide (MBAA) was purchased from Alfa Aesar Co., Ltd. Hexachloroplatinic (IV) acid hexahydrate ( $\text{H}_2\text{PtCl}_6 \cdot 6\text{H}_2\text{O}$ ), iridous chloride ( $\text{IrCl}_3$ ), formaldehyde (HCHO), and sulfuric acid ( $\text{H}_2\text{SO}_4$ ) were obtained from Sinopharm Chemical Reagent Co., Ltd. Commercial Pt black catalyst was supplied by Johnson Matthey Corporation. All these reagents were of analytical reagent grade and used without further purification.

**Preparation of Pt<sub>7</sub>Ir nanobowls.** For a typical synthesis of Pt<sub>7</sub>Ir NBs, 50 mg of MBAA was initially dissolved into 7.0 mL of distilled water. Then, 0.75 mL of 0.05 M  $\text{H}_2\text{PtCl}_6$  solution and 0.25 mL of 0.05 M  $\text{IrCl}_3$  solution were successively added into the above solution under the constant stirring for 5 min. After that, 1.5 mL of HCHO solution was introduced to the mixed solution. After stirring for 10 min, the resultant solution was transferred into a 25 mL stainless-steel autoclave, which was heated to 100 °C in an oven and maintained for 4 h. After cooling down to room temperature, the obtained products were separated by centrifugation, further washed by ethanol aqueous solution (1:1) for several times, and then followed by freeze-drying. As a contrast, Pt<sub>4</sub>Ir and Pt<sub>2</sub>Ir samples were also prepared through the same synthetic condition except changing the feeding ratio of  $\text{H}_2\text{PtCl}_6$  and  $\text{IrCl}_3$  to 1:1 and 1:3, respectively.

**Materials Characterization.** The morphology of the samples was measured by the SEM (Hitachi S5500), TEM, HRTEM (JEOL JEM-2100F, 200 kV), and AC

HAADF-STEM (JEOL JEM-ARM 200F). XRD patterns were obtained on a Model D/max-rC X-ray diffractometer using Cu K $\alpha$  radiation source ( $\lambda = 1.5406 \text{ \AA}$ ). EDS spectra were performed on a scanning electron microscope of Hitachi S5500. XPS analyses were carried out on a Thermo VG Scientific ESCALAB 250 spectrometer with a monochromatic Al K $\alpha$  X-ray source.

***Electrochemical Measurements.*** All the electrochemical tests were carried out on a CHI 760E electrochemical workstation using a standard three-electrode system at room temperature. The detailed configuration of the three-electrode system is listed as follows. The catalyst-modified glassy carbon electrode, a platinum wire and a saturated calomel electrode were used as the working electrode, the auxiliary electrode, and the reference electrode, respectively. The catalyst ink was prepared by dispersing 2 mg of catalyst into 1 mL deionized water with the sonication treatment for 20 min. After that, 8  $\mu\text{L}$  of the above suspension and 3  $\mu\text{L}$  of Nafion solution (5 wt%) were dropped onto the surface of glassy carbon electrode. The HER measurement was conducted in N<sub>2</sub>-saturated 0.5 M H<sub>2</sub>SO<sub>4</sub> solution. The linear sweep voltammetry (LSV) curves were performed at a sweep rate of 5 mV s<sup>-1</sup>.

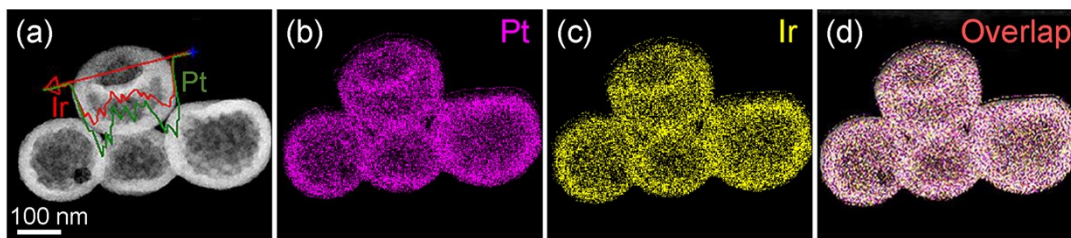

**Fig. S1.** (a) EDX line scanning profiles and (b-d) elemental mapping images of Pt<sub>7</sub>Ir NBs.

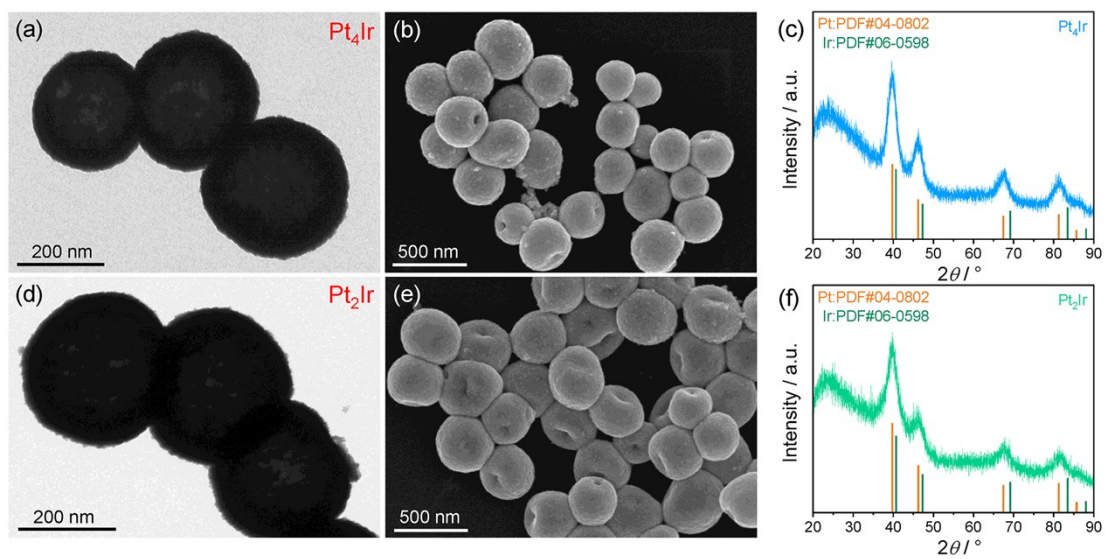

**Fig. S2.** TEM images, SEM images and XRD patterns of (a-c) Pt<sub>4</sub>Ir NBs and (d-f) Pt<sub>2</sub>Ir NBs.

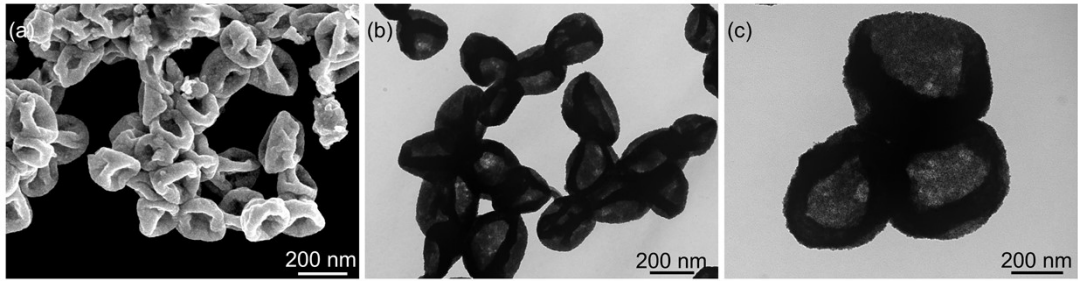

**Fig. S3** SEM (a) and TEM (b-c) images of pure Pt nanobowls.

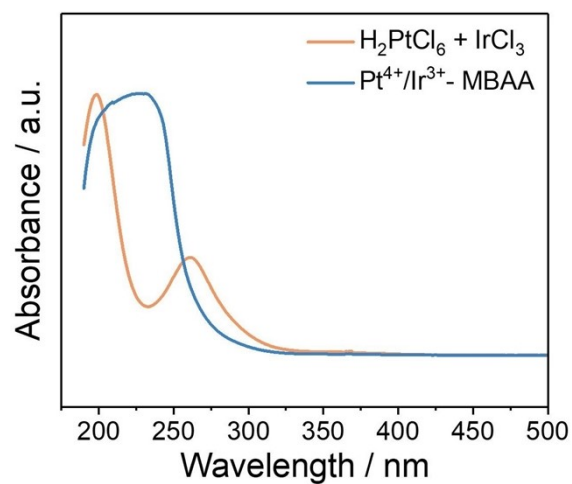

**Fig. S4** UV/Vis absorption spectra of H<sub>2</sub>PtCl<sub>6</sub> + IrCl<sub>3</sub> solution, and the mixture solution of H<sub>2</sub>PtCl<sub>6</sub>, IrCl<sub>3</sub> and MBAA.

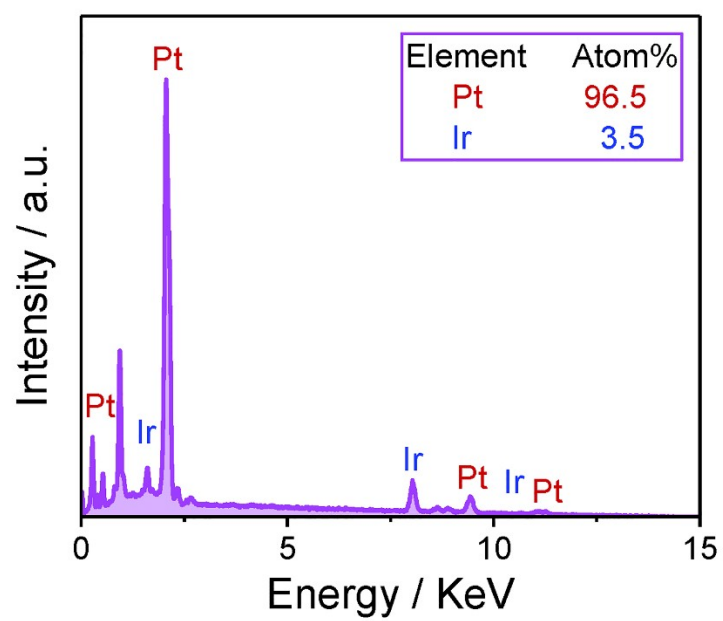

**Fig. S5.** EDS spectrum of the intermediate sample harvested at 30 min.



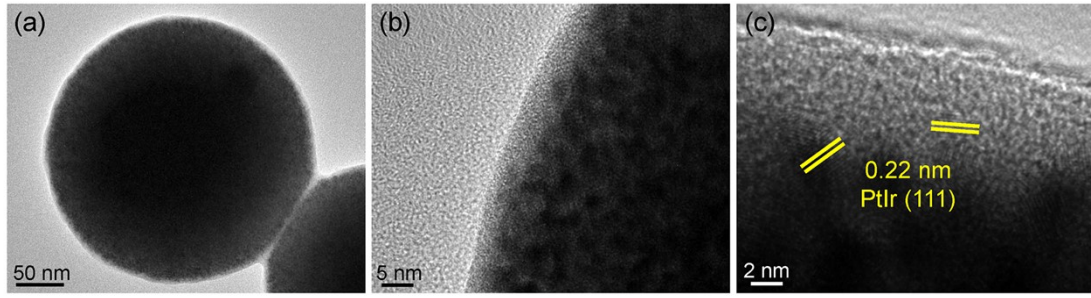

**Fig. S6.** TEM and HRTEM images of the intermediate sample collected at 1 h.

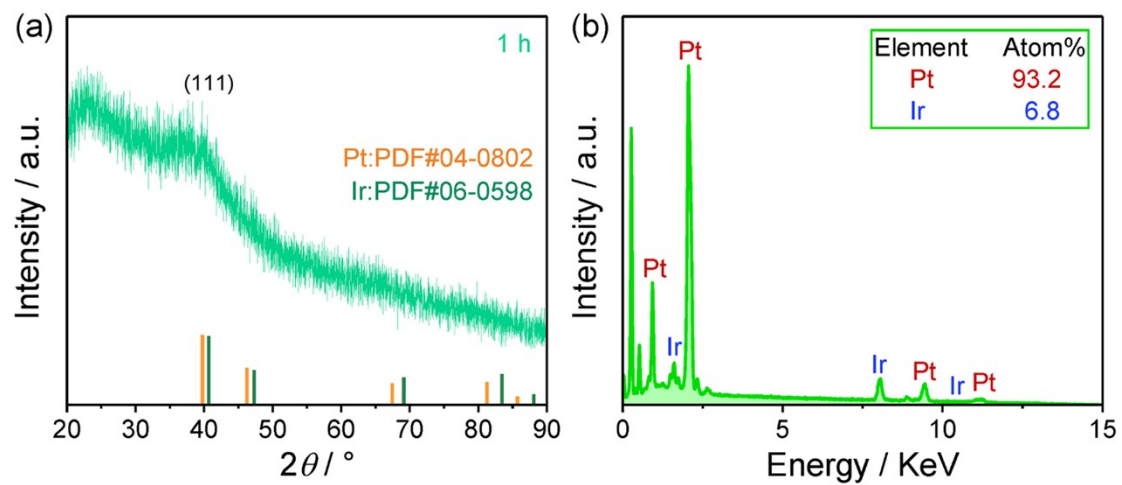

**Fig. S7.** (a) XRD pattern and (b) EDS spectrum of the intermediate sample obtained at 1 h.

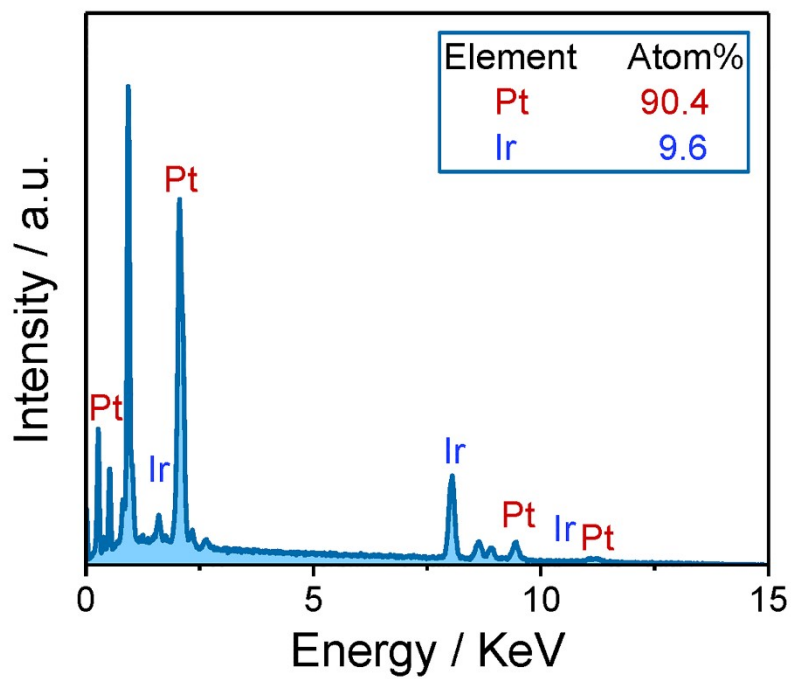

**Fig. S8** EDS spectrum of the intermediate product obtained at 2 h.

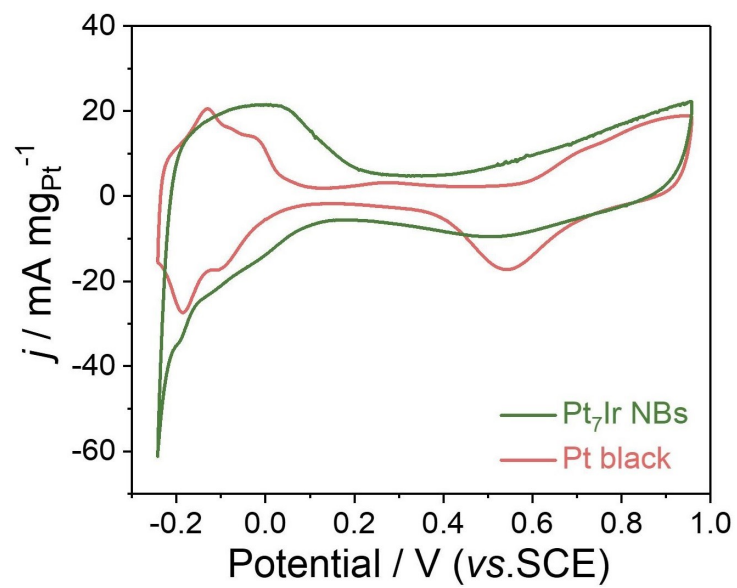

**Fig. S9** CVs of Pt<sub>7</sub>Ir NBs and Pt black in H<sub>2</sub>SO<sub>4</sub> solution.

**Table S1.** HER activity comparisons of Pt<sub>7</sub>Ir NBs with previously reported catalysts.

| <b>Sample</b>                        | <b><math>\eta_{10}</math><br/>(mV)</b> | <b>Tafel slope<br/>(mV dec<sup>-1</sup>)</b> | <b>Reference</b>                                   |
|--------------------------------------|----------------------------------------|----------------------------------------------|----------------------------------------------------|
| Pt <sub>7</sub> Ir NBs               | 20                                     | 12.5                                         | This work                                          |
| np-Pd <sub>50</sub> Ir <sub>50</sub> | 21                                     | 24                                           | <i>J. Mater. Chem. A.</i> 2023, 11,<br>11526       |
| PtW <sub>6</sub> O <sub>24</sub> /C  | 22                                     | 29.8                                         | <i>Nat Commun.</i> 2020, 11, 490                   |
| Pd/Cu-Pt NRs                         | 22.8                                   | 25                                           | <i>Angew. Chem. Int. Ed.</i> 2017, 56,<br>16047    |
| Pt <sub>2</sub> Pd <sub>1</sub> NC   | 25                                     | 32                                           | <i>ACS Appl. Energy Mater.</i> 2020, 3,<br>11142   |
| IrNi NFs                             | 25                                     | 29.7                                         | <i>Small Methods.</i> 2020, 4, 1900129             |
| Pt <sub>2</sub> Sr/NC                | 27                                     | 26                                           | <i>J Energy Chem.</i> 2022, 64, 315                |
| PtSb NPs                             | 27                                     | 50.45                                        | <i>J. Colloid Interface Sci.</i> 2021, 584,<br>729 |
| PtCu DNFs                            | 27                                     | 34                                           | <i>ACS Appl. Energy Mater.</i> 2018, 1,<br>5054    |
| PdCuIr/C                             | 27                                     | NA                                           | <i>Angew. Chem. Int. Ed.</i> 2021, 60,<br>8243     |
| PtAg NCs                             | 36                                     | 40                                           | <i>J. Colloid Interface Sci.</i> 2017, 494,<br>15  |
| Ir-Au-Si-2                           | 38.2                                   | 24                                           | <i>ChemCatChem.</i> 2019, 11, 2126                 |
| PtCu/WO <sub>3</sub> @CF             | 41                                     | 45.9                                         | <i>Adv. Funct. Mater.</i> 2022, 32,<br>2112207     |
| H-AgPt NCs                           | 51                                     | 40                                           | <i>J. Colloid Interface Sci.</i> 2017, 505,<br>307 |

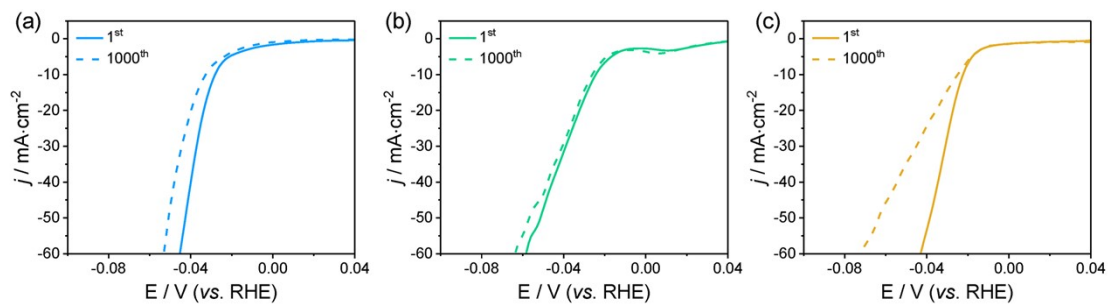

**Fig. S10.** LSV curves before and after 1000 cycles of (a) Pt<sub>4</sub>Ir NBS, (b) Pt<sub>2</sub>Ir NBS and (c) Pt black.

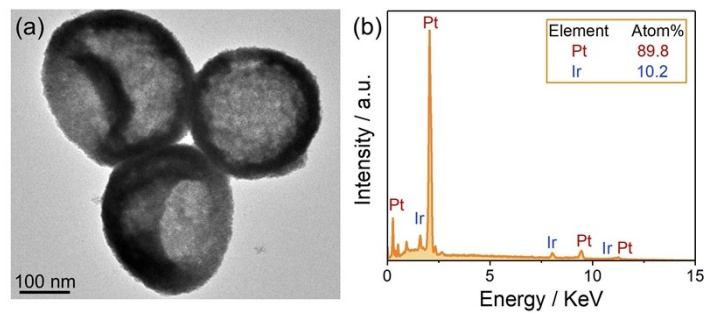

**Fig. S11.** (a) TEM image and (b) EDS spectrum of Pt<sub>7</sub>Ir NBs after 1000 cycles.
